# Supplementary material
Source: PubMed Central journal article supplement (PMC1904132)

*M. avium* 109

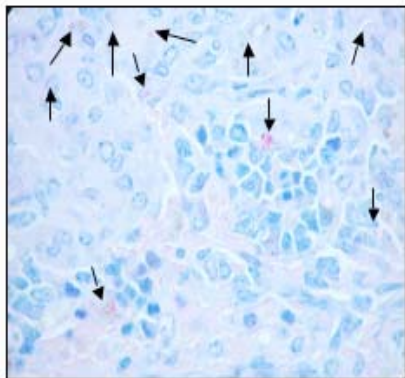

9C3

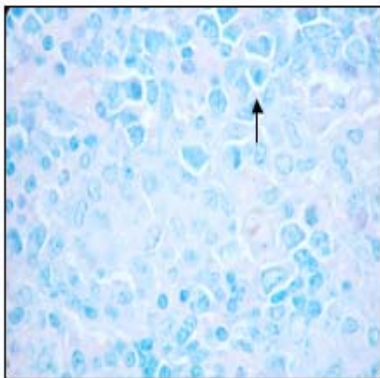

9B9

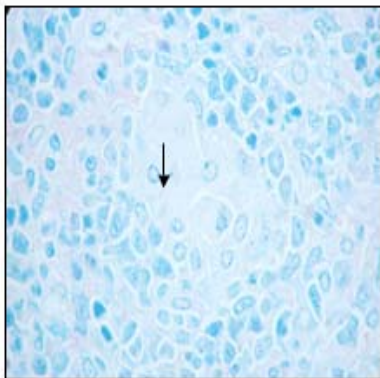

Supplement: pnas_0610746104_1.pdf [file pnas_0610746104_1.pdf]

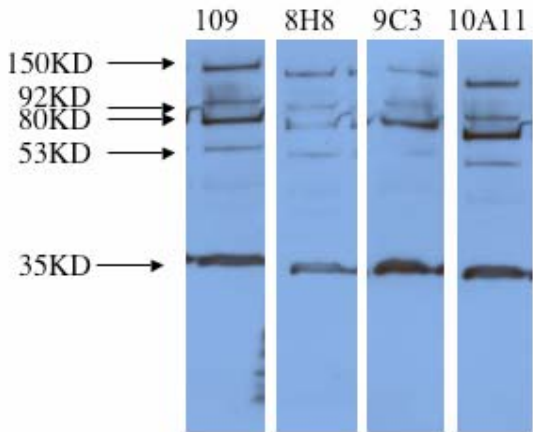

Supplement: pnas_0610746104_2.pdf [file pnas_0610746104_2.pdf]

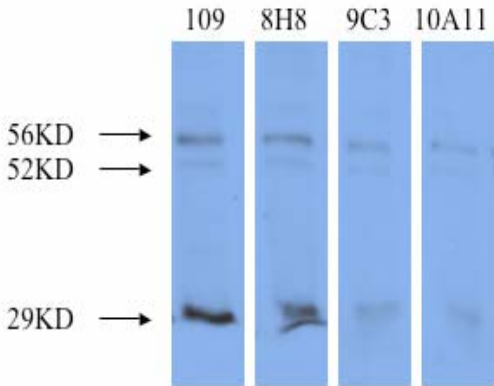

Supplement: pnas_0610746104_3.pdf [file pnas_0610746104_3.pdf]
